# Supplementary material for: Tumor mutational burden quantification from targeted gene panels: major advancements and challenges
Source: J Immunother Cancer. 2019 Jul 15;7:183. doi: 10.1186/s40425-019-0647-4 (PMC6631597; doi:10.1186/s40425-019-0647-4)
Supplement: Supplementary file 1 — Table S1. Technical specifications of gene panels used or proposed for TMB quantification. For each gene panel, it is reported the type of cancer and sample for which it was designed, the enrichment method, the targeted sequencing size (Genomic space) and the number of targeted genes (# genes). (XLSX 6 kb) [file 40425_2019_647_MOESM1_ESM.xlsx]

## Sheet: Foglio1
Gene panel (provider)	Cancer type	Sample	Enrichment method	Genomic space (Mb)	# genes
FM1 (Foundation Medicine) v1	Solid tumors	Tissue	Hybridization capture	1.1	185
FM1 (Foundation Medicine) v2	Solid tumors	Tissue	Hybridization capture	1.1	236
FM1 (Foundation Medicine) v3	Solid tumors	Tissue	Hybridization capture	1.1	315
FM1 CDx (Foundation Medicine)	Solid tumors	Tissue	Hybridization capture	0.8	324
FM1 Heme (Foundation Medicine)	Leukemias, lymphomas, sarcomas	Blood or tissue	Hybridization capture	0.8	406
FM1 bTMB (Foundation Medicine)	Solid tumors	Blood	Hybridization capture	1.1	394
StrandAdvantage (Strand Life Sciences)	Solid tumors	Tissue	Hybridization capture	0.5	152
Trusight170 (Illumina)	Solid tumors	Tissue	Hybridization capture	0.53	170
Oncomine Tumor Mutational Load Assay (Thermofisher)	Solid tumors	Tissue	Amplicon-based	1.65	409
Oncomine Comprehensive Assay v3 (Thermofisher)	Solid tumors	Tissue	Amplicon-based	0.39	161
MSK-IMPACT v1 (Memorial Sloan Kettering)	Solid tumors	Tissue	Hybridization capture	NA	341
MSK-IMPACT v2 (Memorial Sloan Kettering)	Solid tumors	Tissue	Hybridization capture	1.5	410
MSK-IMPACT v3 (Memorial Sloan Kettering)	Solid tumors	Tissue	Hybridization capture	1.5	468
NovoPM (NovoGene)	Solid tumors	Blood or tissue	Hybridization capture	1.5	548
TSO500 (Illumina)	Solid tumors	Tissue	Hybridization capture	1.9	500
CGP+ (Caris Molecular Intelligence)	Solid tumors	Tissue	Hybridization capture	1.4	592
CANCERPLEX (Kew Inc.)	Solid tumors	Tissue	Hybridization capture	2.8	435
Somatic Tumor Panel (CeGaT)	Solid tumors	Tissue	Hybridization capture	2.2	710
Guardant360 (Guardant Health)	Solid tumors	Blood	Hybridization capture	0.8	73
GuardantOMNI (Guardant Health)	Solid tumors	Blood	Hybridization capture	2.1	500
NCC-GP150 (National Cancer Center Japan)	Solid tumors	Blood	Hybridization capture	NA	150
CancerSelectR 203 (PGDx)	NA	Blood or tissue	Hybridization capture	NA	203
CancerSelectR 88 (PGDx)	NA	Blood or tissue	Hybridization capture	NA	88
NEOplus RUO (NEO New Oncology)	Solid tumors	Tissue	Hybridization capture	> 1.1	> 340
