# Supplementary material for: Tumor mutational burden quantification from targeted gene panels: major advancements and challenges
Source: J Immunother Cancer. 2019 Jul 15;7:183. doi: 10.1186/s40425-019-0647-4 (PMC6631597; doi:10.1186/s40425-019-0647-4)
Supplement: Supplementary file 3 — Table S3. Empirical analysis of the correlation between panel-based and WES-based TMB. Correlation between panel-based and WES-based TMB, considered the gold standard value, is used to estimate the accuracy of panel-based TMB quantification. Correlation analysis is performed on TMB values calculated for samples with matched panel and whole exome sequencing. (XLSX 6 kb) [file 40425_2019_647_MOESM3_ESM.xlsx]

## Sheet: Foglio1
Gene panel (provider)	Statistics	Value	Cancer	# patients	Study
FM1 v3 (Foundation Medicine)	R2	0.74	various	29	Chalmers, Genome Med 2017 (22)
Trusight 170 (Illumina)	R2	0.998	various	27	Zhang, AACR 2017 (24)
Trusight 170 (Illumina)	R	0.84	lung cancer	29	Endris, IJC 2018 (39)
Oncomine Tumor Mutation Load Assay (Thermofisher)	R	0.9	lung cancer	29	Endris, IJC 2018 (39)
Oncomine Tumor Mutation Load Assay (Thermofisher)	R2	0.83	various	12	Chaudhary, Transl Lung Cancer Res 2018 (41)
Oncomine Comprehensive Assay v3 (Thermofisher)	R	0.77	lung cancer	29	Endris, IJC 2018 (39)
MSK-IMPACT (Memorial Sloan Kettering)	R2	0.76	various	135	Zehir, Nat Med 2017 (73)
MSK-IMPACT (Memorial Sloan Kettering)	Spearman's rho	0.86	NSCLC	49	Rizvi, JCO 2018 (42)
NovoPM (NovoGene)	R2	0.99	NA	5	Shan, IASLC conference 2017 (75)
NCC-GP150 (National Cancer center Japan) 1	Spearman's rho	0.62	NSCLC	48	Wang, JAMA 2019 (49)
GuardantOMNI (Guardant Health) 1	R2	0.93	mCRPC	20	Qiu, Sci Rep 2019 (46)
FM1 bTMB (Foundation Medicine) 1	R2	0.89	mCRPC	20	Qiu, Sci Rep 2019 (46)
mCRPC: metastatic castration-resistant prostate cancer; NSCLC: non small cell lung cancer; 1 panel sequencing performed on blood and whole exome sequencing on tissue
Additional References
75. Shan G, Zhao L, Li L, Liu B, Cheng G. Comparison of tumor mutational burden (TMB) derived from whole exome and large panel sequencing in lung cancer. J Thor Oncol. 2017. https://doi.org/10.1016/j.jtho.2017.09.1923.
